# Supplementary material
Source: PubMed Central journal article supplement (PMC4303627)

## Legend

- |                                                                                   |                                           |                                                                                       |                                      |
|-----------------------------------------------------------------------------------|-------------------------------------------|---------------------------------------------------------------------------------------|--------------------------------------|
|    | Prophage addiction proteins               |    | Phage integrase/transposase proteins |
|    | Phage tail associated proteins            |    | Phage terminase proteins             |
|    | Phage lysin proteins                      |    | Phage DNA methylase proteins         |
|    | Phage head associated proteins            |    | Phage helicase proteins              |
|    | Phage baseplate associated proteins       |    | Phage nuclease proteins              |
|    | Non-phage (bacterial) associated proteins |    | Phage DNA/RNA replication proteins   |
|    | Phage transcriptional regulators          |   | Phage antirestriction proteins       |
|  | Phage hypothetical/unknown proteins       |  | Phage antitermination factors        |

## A. Phage gene clusters found in the *Geobacter bemidjensis* genome

### Phage gene cluster 1 (10360 bp)

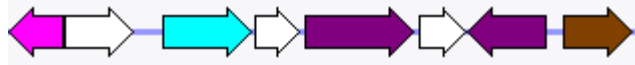

### Phage gene cluster 2 (16561 bp)

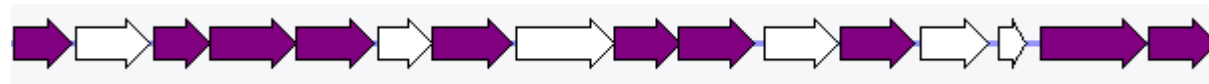

### Phage gene cluster 3 (13525 bp)

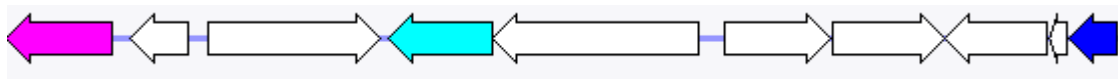

### Phage gene cluster 4 (9666 bp)

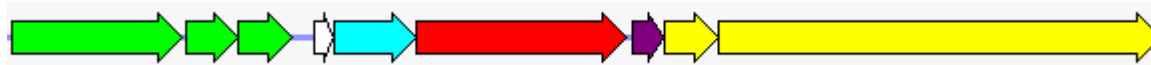

### Phage gene cluster 5 (6153 bp)

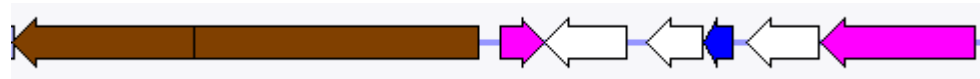

### Phage gene cluster 6 (17943 bp)

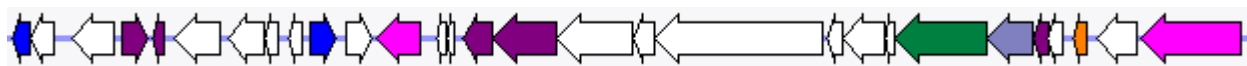

## B. Phage gene clusters found in the *Geobacter daltonii* genome

### Phage cluster 1 (1637 bp)

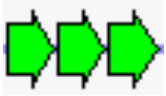

### Phage cluster 2 (18678 bp)

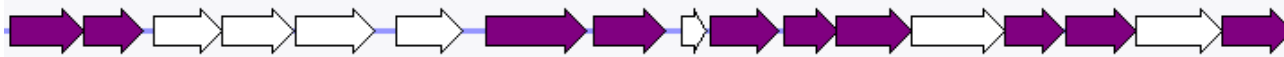

### Phage cluster 3 (7635 bp)

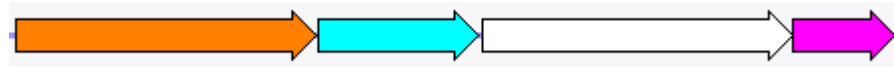

### Phage cluster 4 (9299 bp)

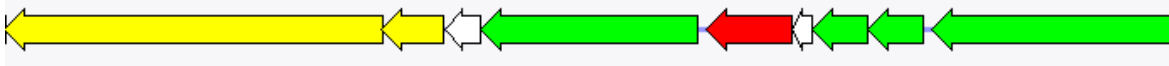

## C. Phage gene clusters found in the *Geobacter sp.* strain M21 genome

### Phage cluster 1 (4970 bp)

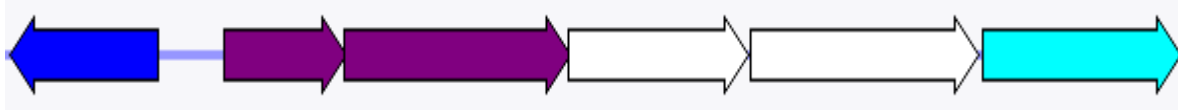

### Phage cluster 2 (28123 bp)

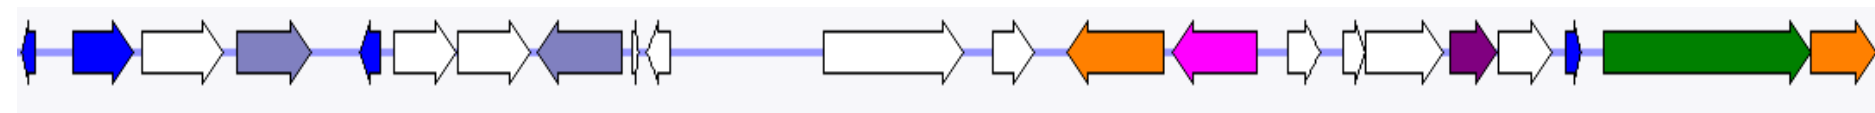

### Phage cluster 3 (16720 bp)

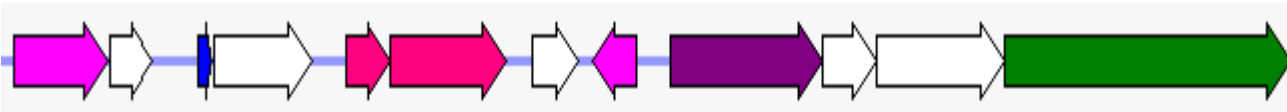

### Phage cluster 4 (11207 bp)

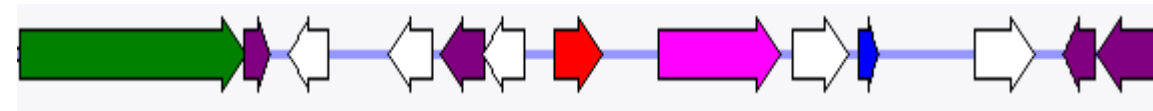

C. Phage gene clusters found in *Geobacter* sp. strain M21 genome (continued)

**Phage cluster 5 (26730 bp)**

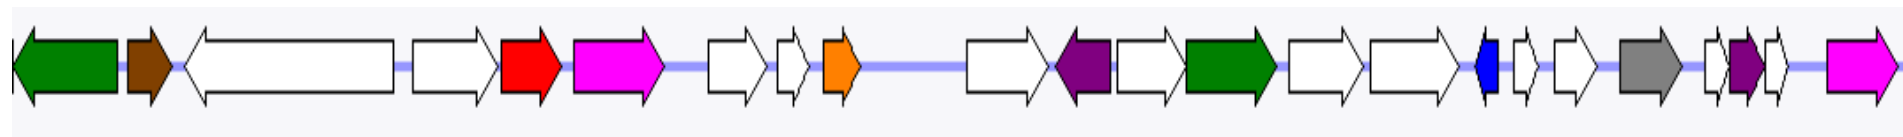

**Phage cluster 6 (21016 bp)**

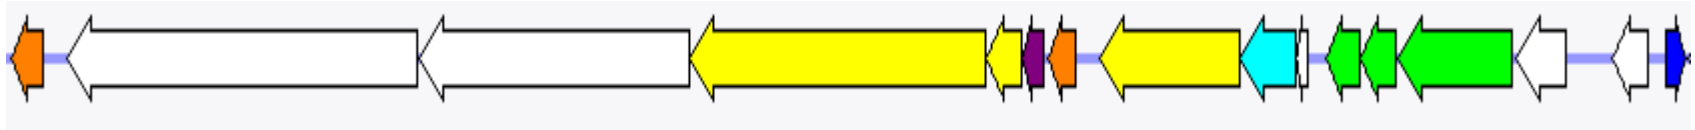

**Phage cluster 7 (9311 bp)**

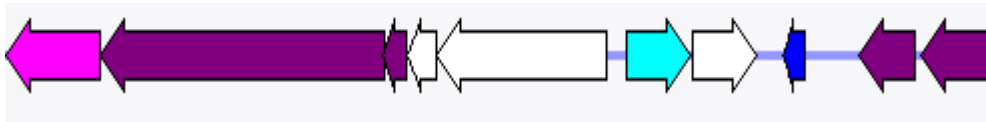

**Phage cluster 8 (46819 bp)**

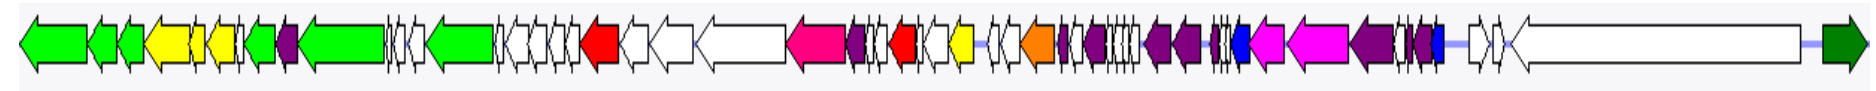

## D. Phage gene clusters found in *Geobacter* strain M18 genome

### Phage gene cluster 1 (20511 bp)

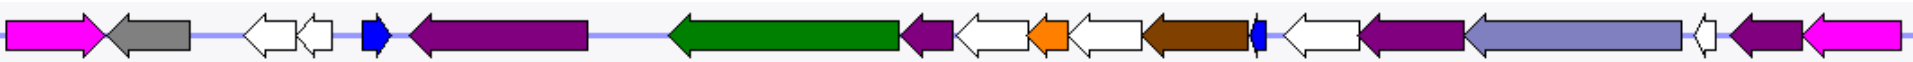

### Phage gene cluster 2 (13572 bp)

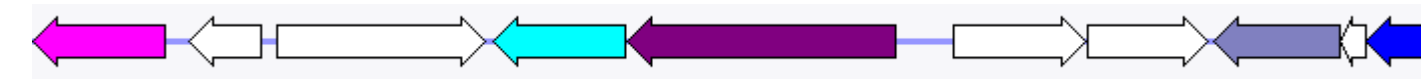

### Phage gene cluster 3 (14417 bp)

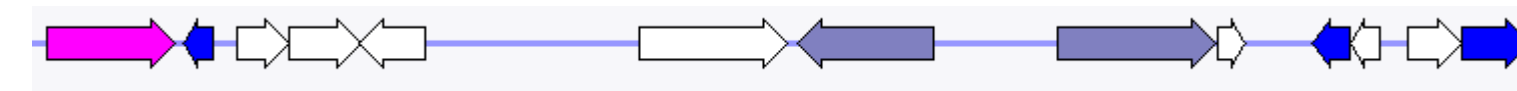

### Phage gene cluster 4 (15688 bp)

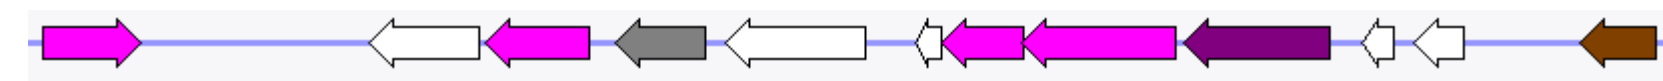

### Phage gene cluster 5 (155375 bp)

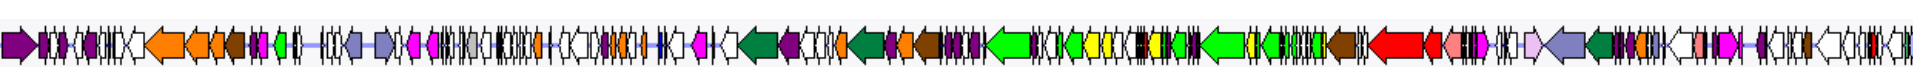

### Phage gene cluster 6 (39051 bp)

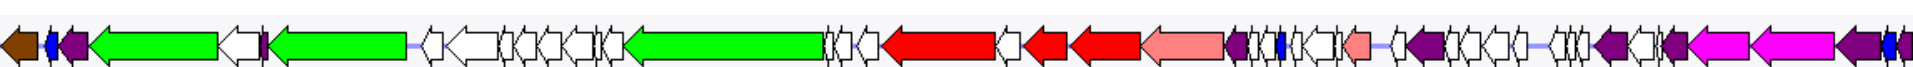

## E. Phage gene clusters found in *Geobacter uraniireducens* genome

### Phage gene cluster 1 (27487 bp)

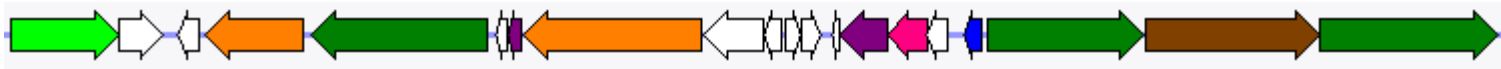

### Phage gene cluster 2 (12021 bp)

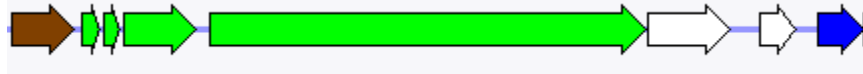

### Phage gene cluster 3 (6351 bp)

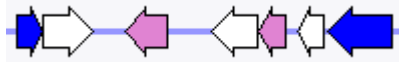

### Phage gene cluster 4 (17418 bp)

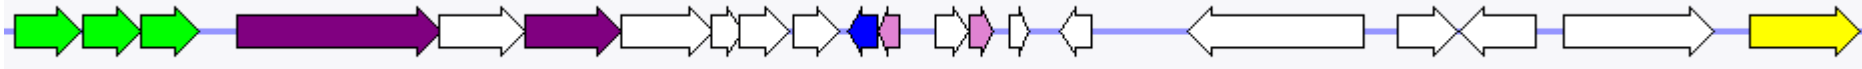

### Phage gene cluster 5 (10050 bp)

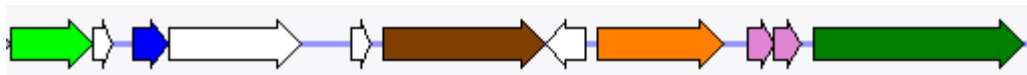

## E. Phage gene clusters found in *Geobacter uraniireducens* genome (continued)

### Phage gene cluster 6 (12155 bp)

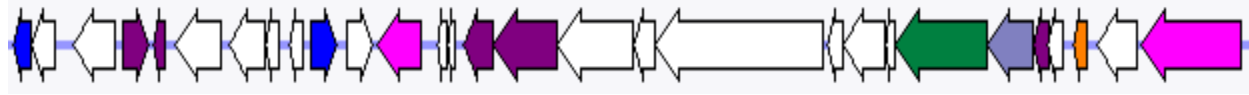

### Phage gene cluster 7 (20363 bp)

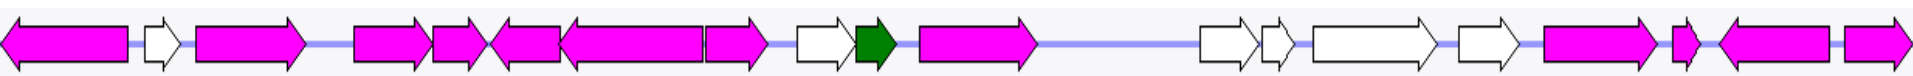

### Phage gene cluster 8 (45493 bp)

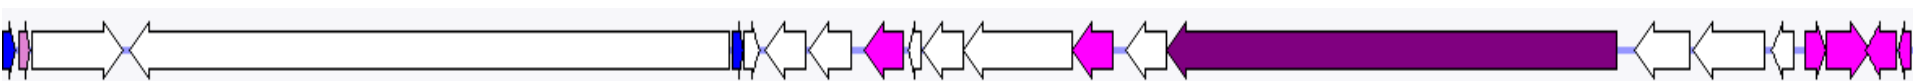

### Phage gene cluster 9 (7272 bp)

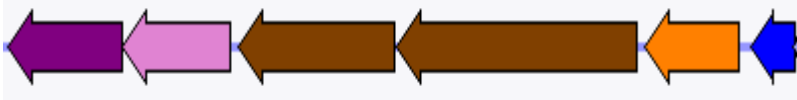

### Phage gene cluster 10 (37962 bp)

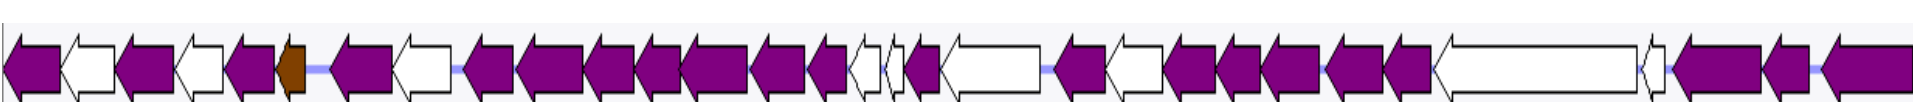

Supplement: ismej2014128x3.pdf [file ismej2014128x3.pdf]
