# Supplementary material
Source: PubMed Central journal article supplement (PMC4303627)

Supplementary Figure S1. Orientation of the monitoring wells relative to the acetate injection gallery during the 2011 field experiment at the Rifle, CO study site.

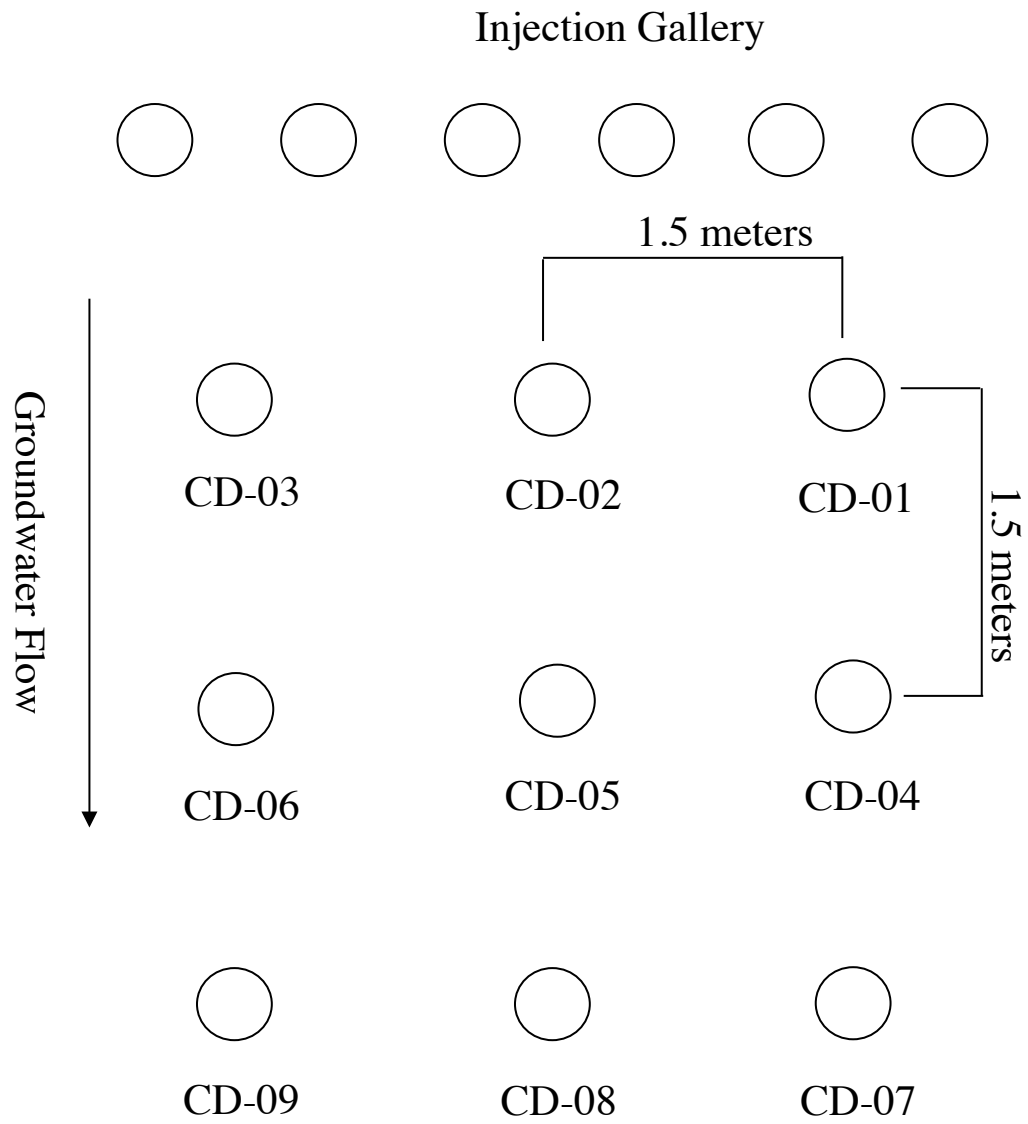

Supplement: ismej2014128x1.pdf [file ismej2014128x1.pdf]
