# Supplementary material
Source: PubMed Central journal article supplement (PMC4303627)

Supplementary Figure 2: SDS-PAGE gels showing induction (A) and purification (B) of recombinant Gp19 protein.(C) Western blot analysis confirming purification and isolation of a Gp19 monomer.

A. Induction of recombinant Gp19 with IPTG

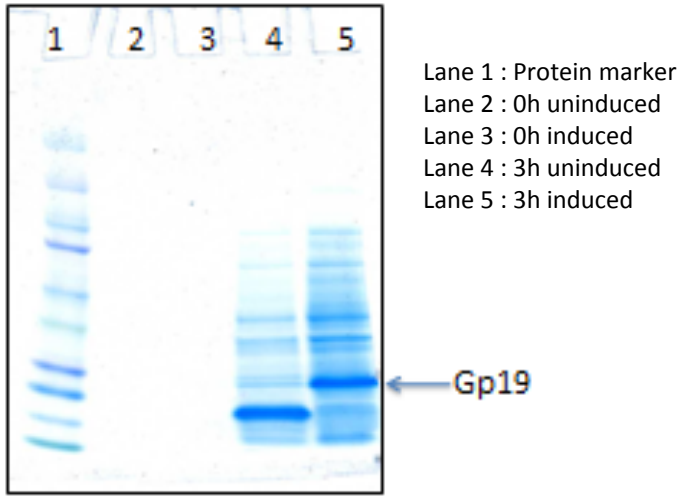

B. Purification of recombinant Gp19 protein

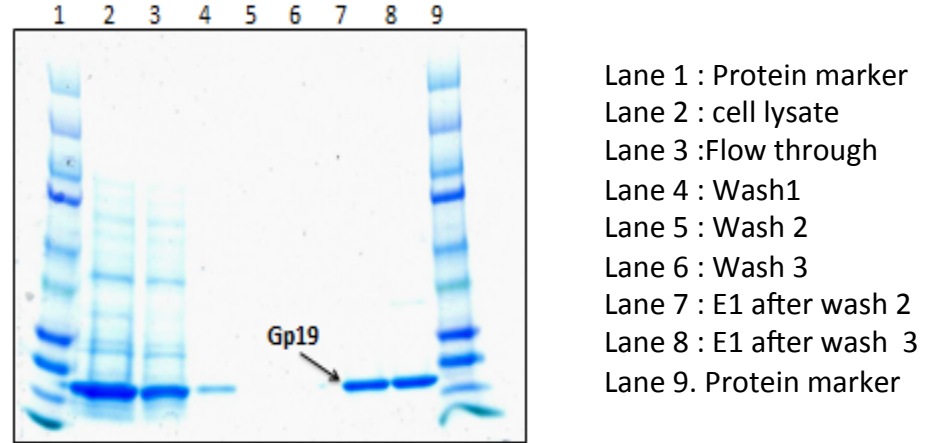

C. Western blot with anti-his antibody confirming identity of Gp19 protein

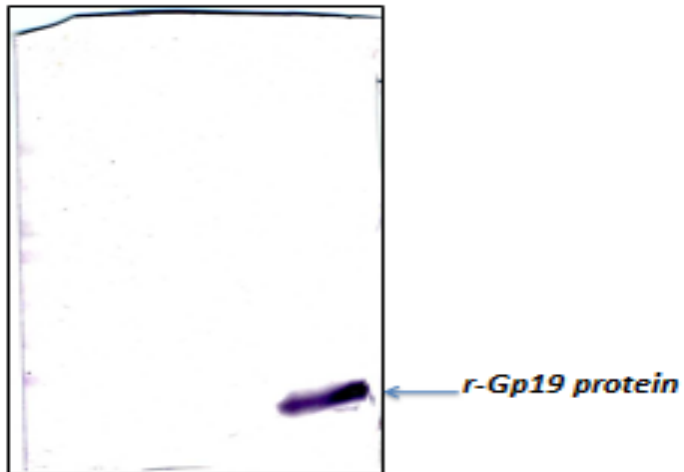

Supplement: ismej2014128x2.pdf [file ismej2014128x2.pdf]
