# Supplementary material
Source: PubMed Central journal article supplement (PMC4303627)

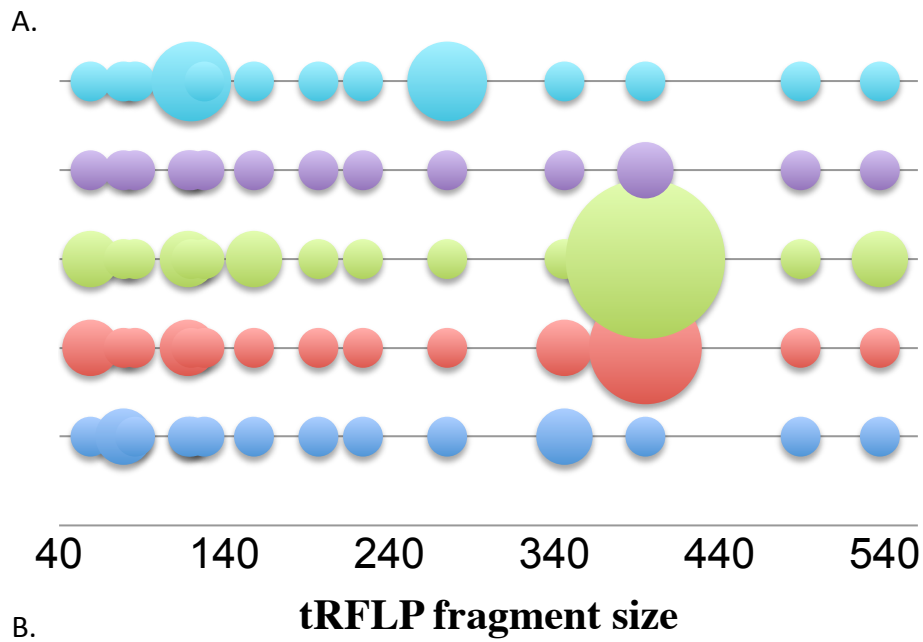

Supplementary Figure S4. (A) Results from tRFLP analyses done on bacterial 16S rRNA gene fragments amplified from the groundwater over the course of the bioremediation experiment. (B) Breakdown of *Geobacter* 16S rRNA gene sequences detected in the groundwater.

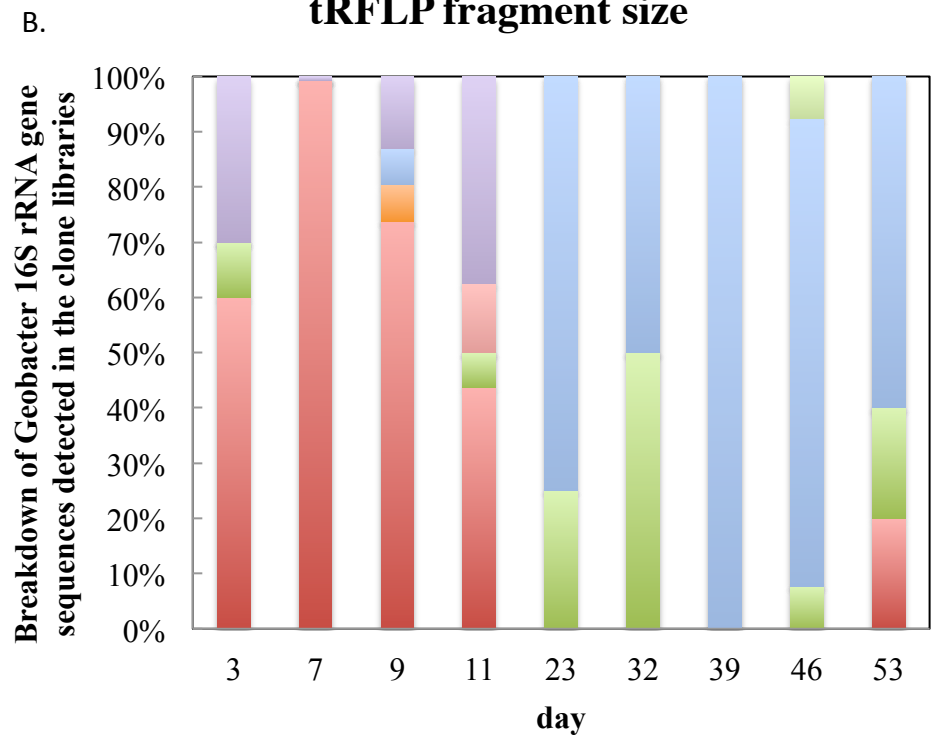

Supplement: ismej2014128x4.pdf [file ismej2014128x4.pdf]
